# Supplementary material for: A GASA Protein Family Gene, CmGEG, Inhibits Petal Growth in Chrysanthemum
Source: MDPI journal article supplement (doi:10.3390/ijms25063367), 2024-03-16
Supplement: s1 [file s1]

## Supplementary Material

**Supplementary Table S1. Primers used**

| Primer name     | Primer sequence (5'→3')         |
|-----------------|---------------------------------|
| EF1 $\alpha$ -F | TTTTGGTATCTGGTCCTGGAG           |
| EF1 $\alpha$ -R | CCATTCAAGCGACAGACTCA            |
| CmGEG-F1        | ATGGCCATCTCGAAGCCTTTTGTGCT      |
| CmGEG-R1        | TTAAGGGCACTTTCTCTTGCCACCATG     |
| CmGEG-F2        | CGCGGATCCATGGCCATCTCGAAGCCTTT   |
| CmGEG-R2        | GACGTCGACAGGGCACTTTCTCTTGCCA    |
| pTRV2-CmGEG-F   | CGCGGATCCATGGCCATCTCGAAGCCTTT   |
| pTRV2-CmGEG-R   | CCGGAATTCATGATAACTTACACCTAGCC   |
| CmGEG-F3        | CGGGGTACCATGGCCATCTCGAAGCCTTT   |
| CmGEG-R3        | CGCGGATCCTTAAGGGCACTTTCTCTTGCCA |
| qCmGEG-F8       | GGCCATCTCGAAGCCTTTTGT           |
| qCmGEG-R8       | GTGCGCCTCTTTCCATCAAA            |
