# Supplementary material for: A GASA Protein Family Gene, CmGEG, Inhibits Petal Growth in Chrysanthemum
Source: MDPI journal article supplement (doi:10.3390/ijms25063367), 2024-03-16
Supplement: s1 [file s1]

## Supplementary Material

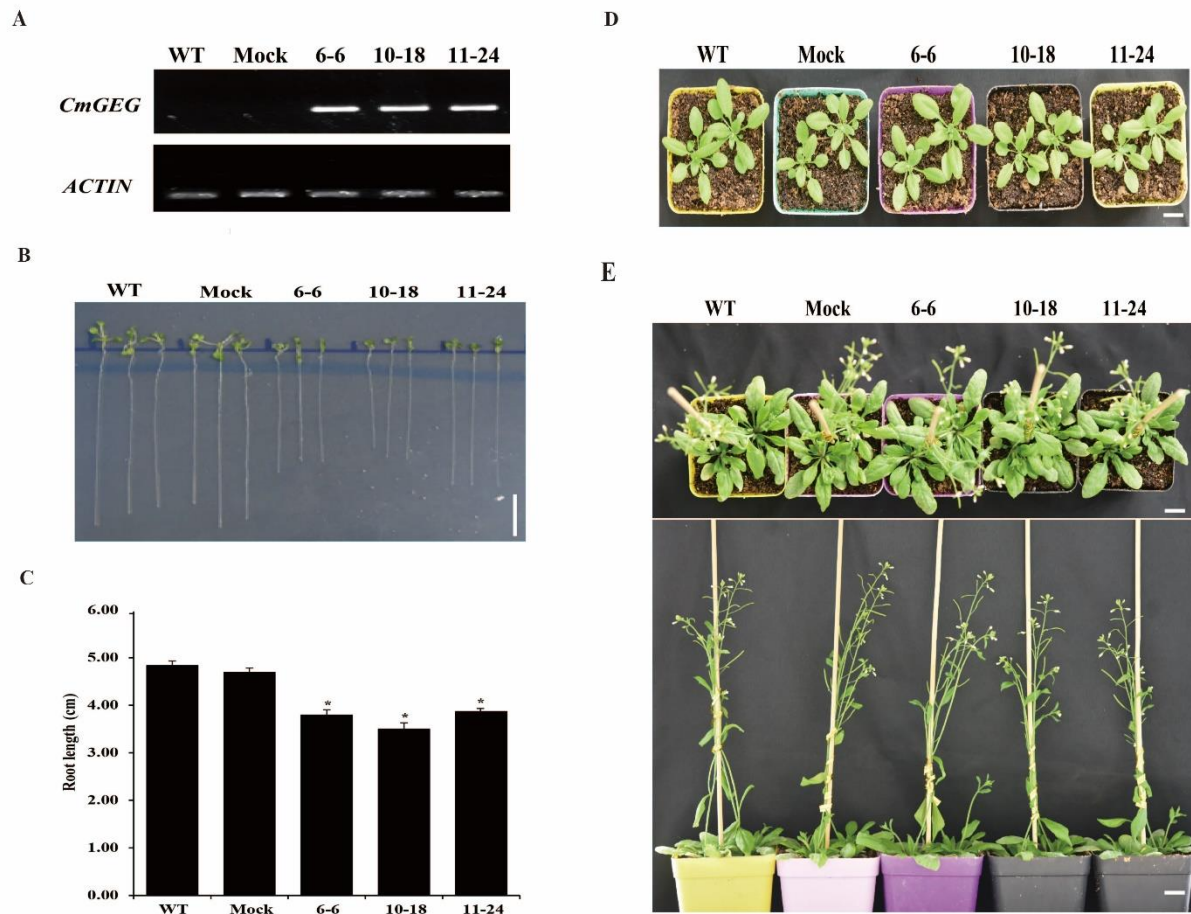

**Supplementary Figure S1.** Phenotypes of *CmGEG*-OE lines in *Arabidopsis*. (A) RT-PCR analysis of T<sub>3</sub> *CmGEG*-overexpressing transgenic lines and *AtEF1α* is the reference gene. (B) Root length phenotypes of *CmGEG*-OE lines. (C) Statistics of root length in *CmGEG*-OE lines. (D, E) Phenotype of *CmGEG*-OE lines after seedling establishment. Scale bar = 1 cm. 6-6, 10-18 and 11-24 indicate three independent homozygous lines. \*  $p < 0.05$ .

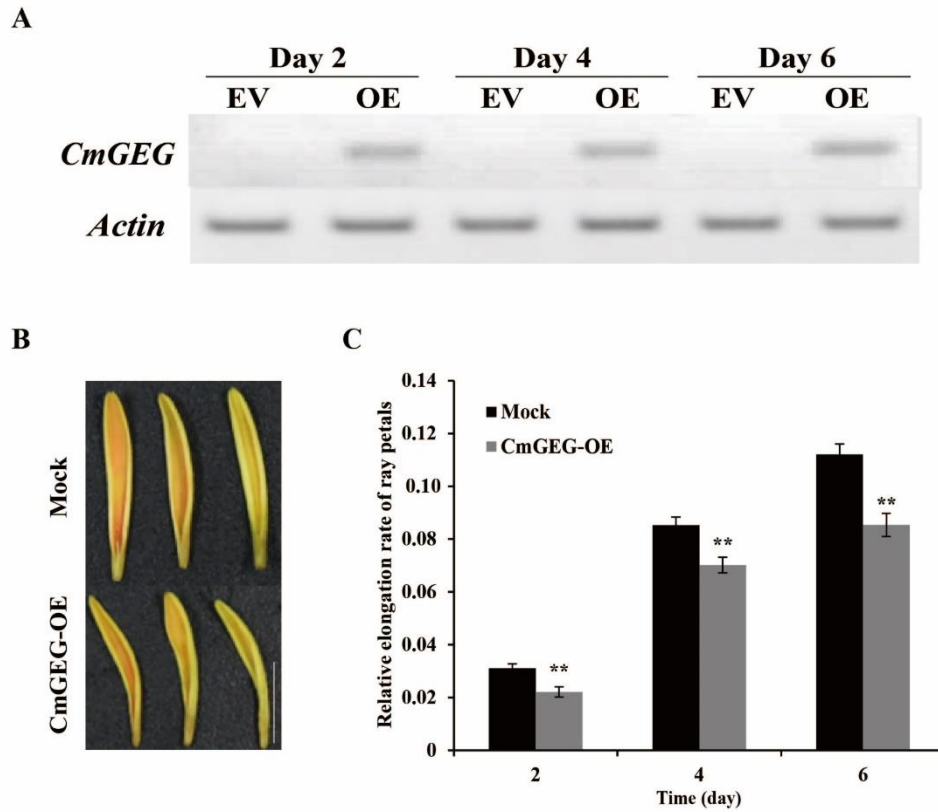

**Supplementary Figure S2.** *CmGEG* inhibits the elongation of ray petals in gerbera. (A) RT-PCR analysis of *CmGEG* expression levels at days 2, 4 and 6 of culture. EV: Empty Vector; OE: Overexpression. (B) Petal phenotypes of CmGEG-OE and Mock after 6 days of culturing. (C) Relative elongation rates of ray petals in CmGEG-OE and Mock. Values are the mean  $\pm$  SD from three biological replicates. Scale bar = 1 cm. \*\*  $p < 0.01$

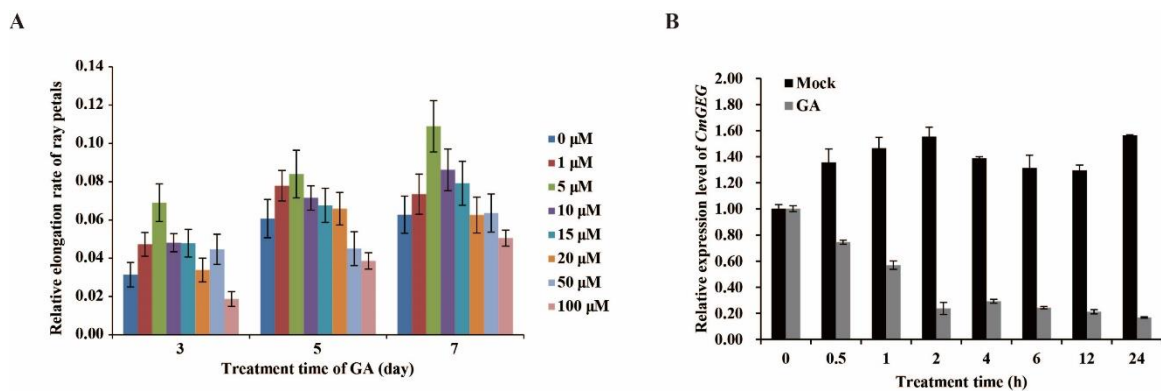

**Supplementary Figure S3.** Effects of GA on petal growth in chrysanthemum. (A) The relative elongation rate of petals treated with different concentrations of GA and deionized water (control) for 7 days. (B) The relative expression level of *CmGEG* in petals were detected at different time points (0, 0.5, 1, 2, 4, 8, 12, and 24 h) under the deionized water (control), GA (5  $\mu$ M) treatments. Values are the mean  $\pm$  SD from three biological replicates.
